# Supplementary material
Source: HighWire-hosted journal article supplement (http://www.annfammed.org/highwire/filestream/8916/field_highwire_adjunct_files/0/KatzAFM-640-17-s01.pdf)
Supplement: KatzAFM-640-17-s01.pdf [file KatzAFM-640-17-s01.pdf]

## Supplemental materials for:

Katz A, Chateau D, Enns JE, Valdivia J, Taylor C, Walld R, McCulloch S. Association of the social determinants of health with quality of primary care. *Ann Fam Med*. 2018;16(3):217-224.

## Appendix 1.

### Manitoba Population Research Data Repository Datasets used in this Study

| Dataset                                           | Description                                                                                 |
|---------------------------------------------------|---------------------------------------------------------------------------------------------|
| Medical Services                                  | Claims for physician visits and tests ordered                                               |
| Provider Registry                                 | Healthcare provider and practice information                                                |
| Manitoba Health Insurance Registry                | Demographic data (e.g., sex, age, postal code)                                              |
| Canada Census                                     | Demographic data (e.g., income)                                                             |
| Drug Program Information Network                  | Prescription drugs dispensed at community pharmacies                                        |
| Emergency Department Information System           | Emergency department visit information                                                      |
| Hospital Discharge Abstracts                      | Demographic and clinical data on hospitalized patients                                      |
| Manitoba Cancer Registry                          | Registry of cancer cases (type, stage, date and place of diagnosis)                         |
| Health Links – Info Santé                         | Triage and care advice given by telephone                                                   |
| Manitoba Immunization Monitoring System           | Vaccination dates and identifiers                                                           |
| Manitoba Colorectal Cancer Screening Program      | Data on colorectal cancer screening                                                         |
| Social Allowance Management Information Network   | Income assistance data                                                                      |
| Tenant Management System                          | Social housing data                                                                         |
| Prosecution Information and Scheduling Management | Justice system involvement, including being accused of, a victim of or a witness to a crime |
| Long Term Care Utilization                        | Residents of nursing homes or personal care homes                                           |
| Child and Family Services Applications and Intake | Involvement with child welfare services                                                     |
